# Supplementary material for: Environment-Wide Association Study of Blood Pressure in the National Health and Nutrition Examination Survey (1999–2012)
Source: PubMed Central journal article supplement (PMC4960597; doi:10.1038/srep30373), 2016-07-26
Supplement: srep30373-s1.pdf [file srep30373-s1.pdf]

Environment-Wide Association Study of Blood Pressure in the National Health and Nutrition Examination Survey (1999-2012)

Denise P. McGinnis<sup>1</sup>, John S. Brownstein<sup>1</sup>, \*Chirag J. Patel<sup>2</sup>

A) **SBP**  
(all ages)

| Variable Name<br>(change per 1 SD<br>of the logarithm<br>of factor) | 2007-2008                |              |             | 2009-2010                |               |             | 2011-2012                |              |             |
|---------------------------------------------------------------------|--------------------------|--------------|-------------|--------------------------|---------------|-------------|--------------------------|--------------|-------------|
|                                                                     | Effect<br>Size<br>(mmHg) | 95% CI       | p-<br>value | Effect<br>Size<br>(mmHg) | 95%CI         | p-<br>value | Effect<br>Size<br>(mmHg) | 95%CI        | p-<br>value |
| Alcohol                                                             | 0.03                     | [0.02,0.05]  | 0.011       | 0.05                     | [0.03,0.06]   | 0.003       | NA                       | NA           | NA          |
| Mercury, urine                                                      | -1.43                    | [-2.27,0.06] | 0.016       | -1.10                    | [-2.04,-0.17] | 0.060       | NA                       | NA           | NA          |
| Equol                                                               | -1.23                    | [-2.20,0.26] | 0.050       | -1.74                    | [-2.62,-0.86] | 0.008       | NA                       | NA           | NA          |
| Cadmium, urine                                                      | -1.10                    | [-2.04,0.02] | 0.063       | -1.54                    | [-2.64,-0.43] | 0.034       | -0.96                    | [-2.46,0.53] | 0.247       |

B) **SBP**  
(age<18 years)

| Variable Name<br>(change per 1 SD<br>of the logarithm<br>of factor) | 2007-2008                |              |             | 2009-2010                |               |             | 2011-2012                |              |             |
|---------------------------------------------------------------------|--------------------------|--------------|-------------|--------------------------|---------------|-------------|--------------------------|--------------|-------------|
|                                                                     | Effect<br>Size<br>(mmHg) | 95% CI       | p-<br>value | Effect<br>Size<br>(mmHg) | 95%CI         | p-<br>value | Effect<br>Size<br>(mmHg) | 95%CI        | p-<br>value |
| Alcohol                                                             | -0.01                    | [-0.11,0.09] | 0.816       | -0.12                    | [0.31,0.78]   | 0.302       | NA                       | NA           | NA          |
| Mercury, urine                                                      | -0.76                    | [-2.30,0.78] | 0.387       | 0.14                     | [-0.86,1.14]  | 0.801       | NA                       | NA           | NA          |
| Equol                                                               | 0.17                     | [0.85,1.20]  | 0.760       | -0.82                    | [-1.55,-0.09] | 0.094       | NA                       | NA           | NA          |
| Cadmium, urine                                                      | 0.09                     | [-0.56,0.75] | 0.793       | -0.91                    | [-2.35,0.54]  | 0.285       | -1.10                    | [-2.26,0.06] | 0.120       |

| SBP<br>(age≥18 years)<br>Variable Name<br>(change per 1<br>SD of the<br>logarithm of<br>factor) | 2007-2008                |              |             | 2009-2010                |               |         | 2011-2012                |             |             |
|-------------------------------------------------------------------------------------------------|--------------------------|--------------|-------------|--------------------------|---------------|---------|--------------------------|-------------|-------------|
|                                                                                                 | Effect<br>Size<br>(mmHg) | 95% CI       | p-<br>value | Effect<br>Size<br>(mmHg) | 95%CI         | p-value | Effect<br>Size<br>(mmHg) | 95%CI       | p-<br>value |
| Alcohol                                                                                         | 0.03                     | [0.01,0.05]  | 0.071       | 0.05                     | [0.03,0.07]   | 0.010   | NA                       | NA          | NA          |
| Mercury, urine                                                                                  | -1.36                    | [-2.47,0.25] | 0.075       | -0.48                    | [-1.57,0.60]  | 0.433   | NA                       | NA          | NA          |
| Equol                                                                                           | -1.71                    | [-3.15,0.27] | 0.081       | -1.58                    | [-2.52,-0.64] | 0.030   | NA                       | NA          | NA          |
| Cadmium, urine                                                                                  | -0.91                    | [-2.93,1.11] | 0.428       | -0.16                    | [-1.83,1.50]  | 0.856   | -0.66                    | [2.34,1.03] | 0.480       |

**Supplemental Table S1.** List of environmental factors with an FDR<1% in 1999-2006 meta-analysis that replicated in at least one survey between 2007-2012 with a p<.05 for systolic blood pressure. A) Results for original model adjusted for age, sex, BMI, age-squared, poverty and race/ethnicity for all ages combined. B) Results after additional adjustment for creatinine and cotinine for ages<18 years .C) Results after additional adjustment for creatinine and cotinine for ages≥=18 years. SD=Standard Deviation. CI=Confidence Interval. NA=Not Available.

A) **DBP**  
(all ages)

| Variable Name<br>(change per 1 SD of<br>the logarithm of<br>factor) | 2007-2008                |              |             | 2009-2010                |               |             | 2011-2012                |               |             |
|---------------------------------------------------------------------|--------------------------|--------------|-------------|--------------------------|---------------|-------------|--------------------------|---------------|-------------|
|                                                                     | Effect<br>Size<br>(mmHg) | 95% CI       | p-<br>value | Effect<br>Size<br>(mmHg) | 95% CI        | p-<br>value | Effect<br>Size<br>(mmHg) | 95% CI        | p-<br>value |
| Cesium, urine                                                       | -0.02                    | [-0.84,0.81] | 0.972       | -0.99                    | [-1.64,-0.35] | 0.024       | -0.05                    | [-0.88, 0.79] | 0.917       |

B) **DBP**  
(age<18 years)

| Variable Name<br>(change per 1 SD of<br>the logarithm of<br>factor) | 2007-2008                |               |             | 2009-2010                |                |             | 2011-2012                |              |             |
|---------------------------------------------------------------------|--------------------------|---------------|-------------|--------------------------|----------------|-------------|--------------------------|--------------|-------------|
|                                                                     | Effect<br>Size<br>(mmHg) | 95% CI        | p-<br>value | Effect<br>Size<br>(mmHg) | 95% CI         | p-<br>value | Effect<br>Size<br>(mmHg) | 95% CI       | p-<br>value |
| Cesium, urine                                                       | 0.52                     | [-1.19, 2.23] | 0.582       | -3.45                    | [-5.71, -1.18] | 0.041       | 2.81                     | [-0.70,6.32] | 0.178       |

C) **DBP**  
(age>=18 years)

| Variable Name<br>(change per 1 SD of<br>the logarithm of<br>factor) | 2007-2008                |               |             | 2009-2010                |               |             | 2011-2012                |               |             |
|---------------------------------------------------------------------|--------------------------|---------------|-------------|--------------------------|---------------|-------------|--------------------------|---------------|-------------|
|                                                                     | Effect<br>Size<br>(mmHg) | 95% CI        | p-<br>value | Effect<br>Size<br>(mmHg) | 95% CI        | p-<br>value | Effect<br>Size<br>(mmHg) | 95% CI        | p-<br>value |
| Cesium, urine                                                       | -0.005                   | [-1.42, 1.41] | 0.995       | -0.69                    | [-1.97, 0.59] | 0.350       | 0.18                     | [-1.00,1.35 ] | 0.782       |

**Supplemental Table S2.** List of environmental factors with an FDR<1% in 1999-2006 meta-analysis that replicated in at least one survey between 2007-2012 with a p<.05 for diastolic blood pressure. A) Results for original model adjusted for age, sex, BMI, age-squared, poverty and race/ethnicity for all ages combined. B) Results after additional adjustment for creatinine and cotinine for ages<18 years. C) Results after additional adjustment for creatinine and cotinine for ages>=18 years. SD=Standard Deviation. CI=Confidence Interval. NA=Not Available
